# Supplementary material for: Predicting Cell Populations in Single Cell Mass Cytometry Data
Source: PubMed Central journal article supplement — Cytometry A. 2019 Mar 12;95(7):769–81. doi: 10.1002/cyto.a.23738 (PMC6767556; doi:10.1002/cyto.a.23738), 2019-03-12
Supplement: CYTO-95-769-s001.pdf [file CYTO-95-769-s001.pdf]

**Cytometry Part A**  
**Author Checklist: MIFlowCyt-Compliant Items**

| Requirement                                      | Please Include Requested Information                                                                                                                                                                                                                                                                                                                                                                                                                                                                                                                                                                                                                                                                                                                                                                                                                                                     |
|--------------------------------------------------|------------------------------------------------------------------------------------------------------------------------------------------------------------------------------------------------------------------------------------------------------------------------------------------------------------------------------------------------------------------------------------------------------------------------------------------------------------------------------------------------------------------------------------------------------------------------------------------------------------------------------------------------------------------------------------------------------------------------------------------------------------------------------------------------------------------------------------------------------------------------------------------|
| 1.1. Purpose                                     | Test whether or not a linear classifier can automatically and accurately classify different cell types in mass cytometry datasets, and be used to analyze large cohort studies                                                                                                                                                                                                                                                                                                                                                                                                                                                                                                                                                                                                                                                                                                           |
| 1.2. Keywords                                    | Single cell, Mass cytometry, Cell type prediction, Machine learning                                                                                                                                                                                                                                                                                                                                                                                                                                                                                                                                                                                                                                                                                                                                                                                                                      |
| 1.3. Experiment variables                        | We used five public mass cytometry datasets, including human blood samples, as well as human and mouse bone marrow (described in details in ‘Sample description’)                                                                                                                                                                                                                                                                                                                                                                                                                                                                                                                                                                                                                                                                                                                        |
| 1.4. Organization name and address               | Delft University of Technology<br>Van Mourik Broekmanweg 6, 2628 XE Delft, The Netherlands                                                                                                                                                                                                                                                                                                                                                                                                                                                                                                                                                                                                                                                                                                                                                                                               |
| 1.5. Primary contact name and email address      | Dr. Ahmed Mahfouz<br><a href="mailto:a.mahfouz@lumc.nl">a.mahfouz@lumc.nl</a>                                                                                                                                                                                                                                                                                                                                                                                                                                                                                                                                                                                                                                                                                                                                                                                                            |
| 1.6. Date or time period of experiment           | From 01-11-2017 to 30-09-2018                                                                                                                                                                                                                                                                                                                                                                                                                                                                                                                                                                                                                                                                                                                                                                                                                                                            |
| 1.7. Conclusions                                 | <p>We showed that a linear classifier can be used to automatically assign labels to single cells in mass cytometry data. Using five different datasets, the linear classifier outperforms two state-of-the-art methods (1,2).</p> <p>1. Lee H, Kosoy R, Becker CE, Dudley JT, Kidd BA. Automated cell type discovery and classification through knowledge transfer. <i>Bioinformatics</i> 2017;33:1689–1695.<br/> 2. Li H, Shaham U, Stanton KP, Yao Y, Montgomery RR, Kluger Y. Gating mass cytometry data by deep learning. <i>Bioinformatics</i> 2017;33:3423–3430.</p>                                                                                                                                                                                                                                                                                                               |
| 1.8. Quality control measures                    | We used all the published data from the public datasets, and QC is performed in the original studies.                                                                                                                                                                                                                                                                                                                                                                                                                                                                                                                                                                                                                                                                                                                                                                                    |
| 2.1.1.1. (2.1.2.1., 2.1.3.1.) Sample description | <p>We used five publicly available mass cytometry datasets:</p> <ol style="list-style-type: none"> <li>1. AML is a healthy human bone marrow dataset (3).</li> <li>2. BMMC is also a healthy human bone marrow dataset (4).</li> <li>3. PANORAMA dataset consists of 10 replicates of mice bone marrow cells (5).</li> <li>4. Multi-Center study dataset is a collection of 16 samples drawn from a single subject (2).</li> <li>5. HMIS is a human mucosal immune system consists of 47 Peripheral Blood Mononuclear Cells (PBMC) samples from individuals with inflammatory bowel diseases (6). Samples are divided into control samples, samples with Crohn’s disease, samples with Celiac disease, and samples with Refractory Celiac disease Type II.</li> </ol> <p>2. Li H, Shaham U, Stanton KP, Yao Y, Montgomery RR, Kluger Y. Gating mass cytometry data by deep learning.</p> |

|                                                        |                                                                                                                                                                                                                                                                                                                                                                                                                                                                                                                                                                                                                                                                                                                                                                                                                                                                                                                                                                                                                                                                                                                                                                                                                                                                       |
|--------------------------------------------------------|-----------------------------------------------------------------------------------------------------------------------------------------------------------------------------------------------------------------------------------------------------------------------------------------------------------------------------------------------------------------------------------------------------------------------------------------------------------------------------------------------------------------------------------------------------------------------------------------------------------------------------------------------------------------------------------------------------------------------------------------------------------------------------------------------------------------------------------------------------------------------------------------------------------------------------------------------------------------------------------------------------------------------------------------------------------------------------------------------------------------------------------------------------------------------------------------------------------------------------------------------------------------------|
|                                                        | <p>Bioinformatics 2017;33:3423–3430.</p> <p>3. Levine JH, Simonds EF, Bendall SC, Downing JR, Pe D, Nolan GP, Levine JH, Simonds EF, Bendall SC, Davis KL, Amir ED, Tadmor MD, Downing JR, Pe D, Nolan GP. Data-Driven Phenotypic Dissection of AML Reveals Progenitor-like Cells that Correlate with Prognosis. Cell 2015;162:184–197. Available at: <a href="http://dx.doi.org/10.1016/j.cell.2015.05.047">http://dx.doi.org/10.1016/j.cell.2015.05.047</a>.</p> <p>4. Bendall SC, Simonds EF, Qiu P, Amir ED, Krutzik PO, Finck R, Bruggner R V, Melamed R, Trejo A, Ornatsky OI, Balderas RS, Plevritis SK, Sachs K, Pe’er D, Tanner SD, Nolan GP. Single-Cell Mass Cytometry of Differential Immune and Drug Responses Across a Human Hematopoietic Continuum. Science 2011;332:687–696.</p> <p>5. Samusik N, Good Z, Spitzer MH, Davis KL, Nolan GP. Automated mapping of phenotype space with single-cell data. Nat. Methods 2016;13:493–496.</p> <p>6. van Unen V, Li N, Molendijk I, Temurhan M, Höllt T, van der Meulen-de Jong AE, Verspaget HW, Mearin ML, Mulder CJ, van Bergen J, Lelieveldt BPF, Koning F. Mass Cytometry of the Human Mucosal Immune System Identifies Tissue- and Disease-Associated Immune Subsets. Immunity 2016;44:1227–1239.</p> |
| 2.1.1.2. Biological sample source description          | Bone marrow and blood (PBMC) samples                                                                                                                                                                                                                                                                                                                                                                                                                                                                                                                                                                                                                                                                                                                                                                                                                                                                                                                                                                                                                                                                                                                                                                                                                                  |
| 2.1.1.3. Biological sample source organism description | Human and mice samples                                                                                                                                                                                                                                                                                                                                                                                                                                                                                                                                                                                                                                                                                                                                                                                                                                                                                                                                                                                                                                                                                                                                                                                                                                                |
| 2.1.2.2. Environmental sample location                 | N.A                                                                                                                                                                                                                                                                                                                                                                                                                                                                                                                                                                                                                                                                                                                                                                                                                                                                                                                                                                                                                                                                                                                                                                                                                                                                   |
| 2.3. Sample treatment description                      | N.A                                                                                                                                                                                                                                                                                                                                                                                                                                                                                                                                                                                                                                                                                                                                                                                                                                                                                                                                                                                                                                                                                                                                                                                                                                                                   |
| 2.4. Fluorescence reagent(s) description               | N.A                                                                                                                                                                                                                                                                                                                                                                                                                                                                                                                                                                                                                                                                                                                                                                                                                                                                                                                                                                                                                                                                                                                                                                                                                                                                   |
| 3.1. Instrument manufacturer                           | N.A                                                                                                                                                                                                                                                                                                                                                                                                                                                                                                                                                                                                                                                                                                                                                                                                                                                                                                                                                                                                                                                                                                                                                                                                                                                                   |
| 3.2. Instrument model                                  | N.A                                                                                                                                                                                                                                                                                                                                                                                                                                                                                                                                                                                                                                                                                                                                                                                                                                                                                                                                                                                                                                                                                                                                                                                                                                                                   |
| 3.3. Instrument configuration and settings             | N.A                                                                                                                                                                                                                                                                                                                                                                                                                                                                                                                                                                                                                                                                                                                                                                                                                                                                                                                                                                                                                                                                                                                                                                                                                                                                   |
| 4.1. List-mode data files                              | We used five public datasets, which are available through the original publications (references above), and through our GitHub link: <a href="https://github.com/tabdelaal/CyTOF-Linear-Classifier">https://github.com/tabdelaal/CyTOF-Linear-Classifier</a>                                                                                                                                                                                                                                                                                                                                                                                                                                                                                                                                                                                                                                                                                                                                                                                                                                                                                                                                                                                                          |
| 4.2. Compensation description                          | N.A                                                                                                                                                                                                                                                                                                                                                                                                                                                                                                                                                                                                                                                                                                                                                                                                                                                                                                                                                                                                                                                                                                                                                                                                                                                                   |
| 4.3. Data transformation details                       | We applied hyperbolic arcsin transformation with a cofactor of 5 for all datasets.                                                                                                                                                                                                                                                                                                                                                                                                                                                                                                                                                                                                                                                                                                                                                                                                                                                                                                                                                                                                                                                                                                                                                                                    |
| 4.4.1. Gate description                                | N.A                                                                                                                                                                                                                                                                                                                                                                                                                                                                                                                                                                                                                                                                                                                                                                                                                                                                                                                                                                                                                                                                                                                                                                                                                                                                   |
| 4.4.2. Gate statistics                                 | N.A                                                                                                                                                                                                                                                                                                                                                                                                                                                                                                                                                                                                                                                                                                                                                                                                                                                                                                                                                                                                                                                                                                                                                                                                                                                                   |
| 4.4.3. Gate boundaries                                 | N.A                                                                                                                                                                                                                                                                                                                                                                                                                                                                                                                                                                                                                                                                                                                                                                                                                                                                                                                                                                                                                                                                                                                                                                                                                                                                   |

#### Notes

Feel free to use more space than allocated.

You can embed graphics/figures in this document, if needed.

Please make sure to save the document in Microsoft Word version 2003 or older, before uploading to ScholarOne Manuscripts. When uploading this checklist to ScholarOne Manuscripts, please choose the “Supplementary Material for Review” category.

Please note that if your paper is accepted, the checklist will be published as an Online Supporting Information.

For any questions, please contact the Cytometry Part A editorial office at [Cytometry@wiley.com](mailto:Cytometry@wiley.com).
